# Supplementary material
Source: PubMed Central journal article supplement (PMC5841452)
Supplement: NIHMS946428-supplement-supplementary_information_1.pdf [file NIHMS946428-supplement-supplementary_information_1.pdf]

# Figure 1

Fig. 1a

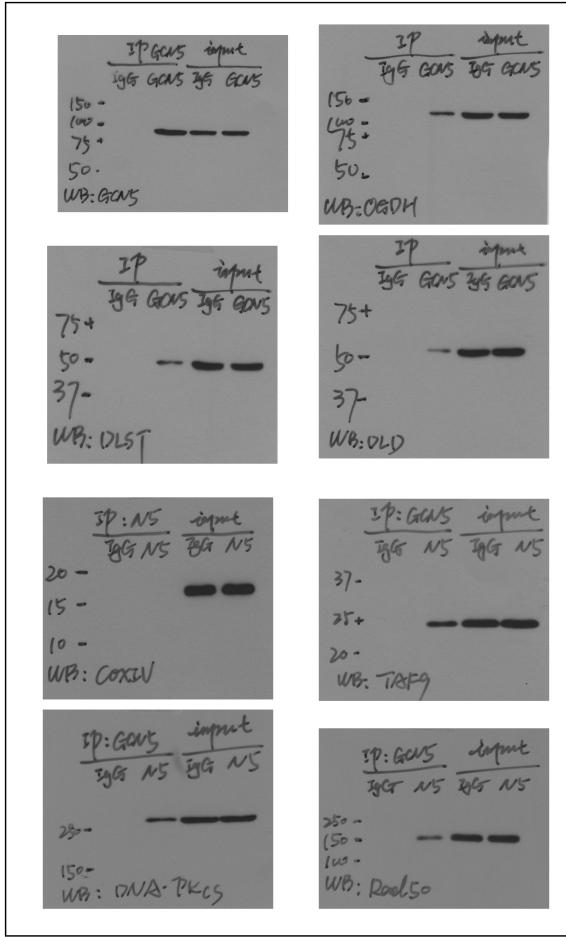

Fig. 1b

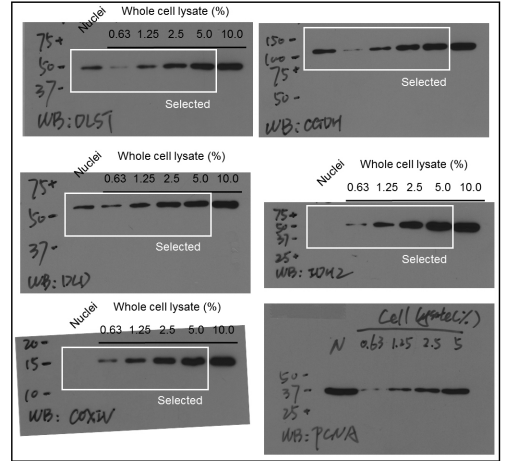

Fig. 1c

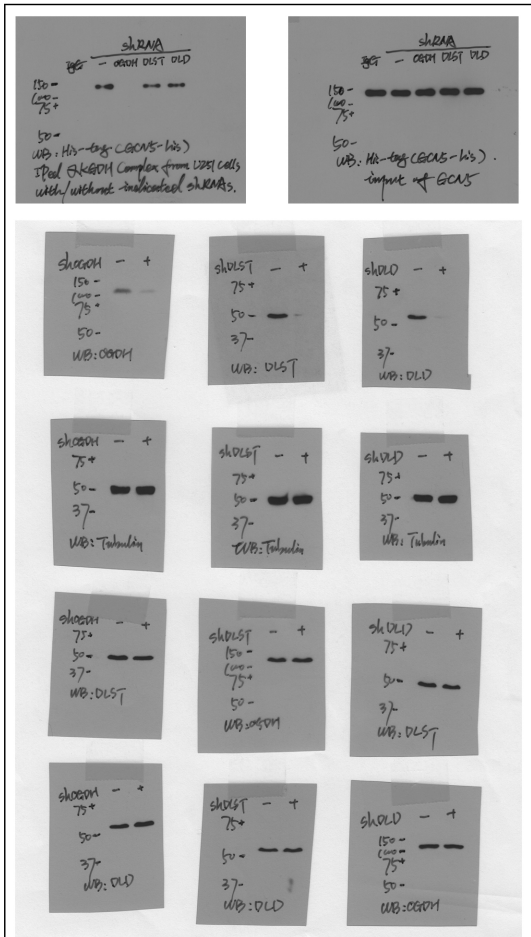

Fig. 1d

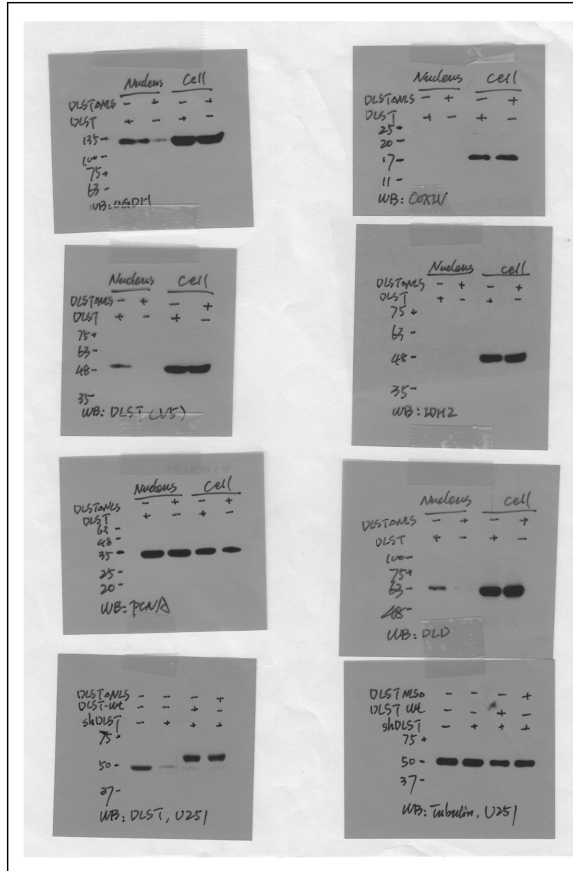

# Figure 2

Fig. 2a

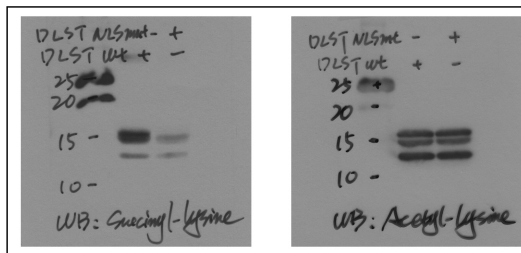

Fig. 2c

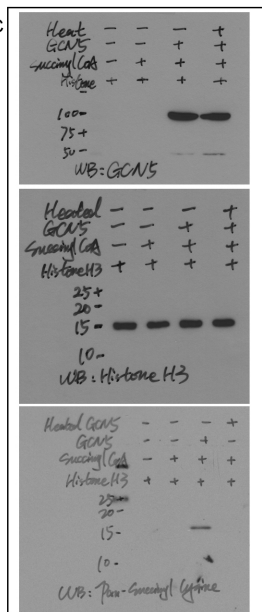

Fig. 2b

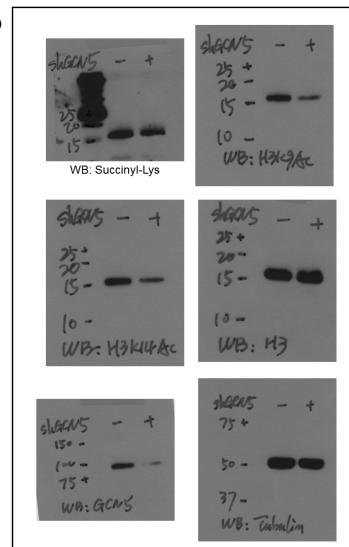

Fig. 2f

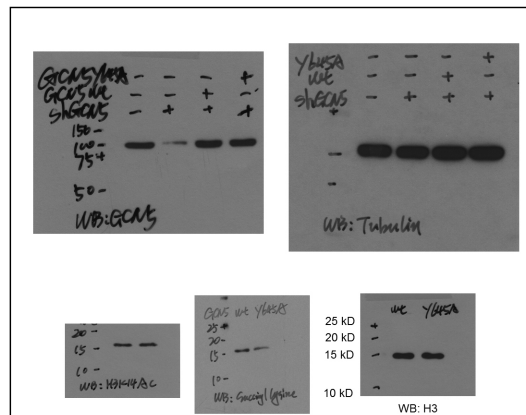

# Figure 3

Fig. 3a

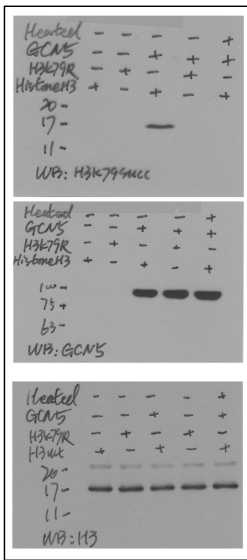

Fig. 3b

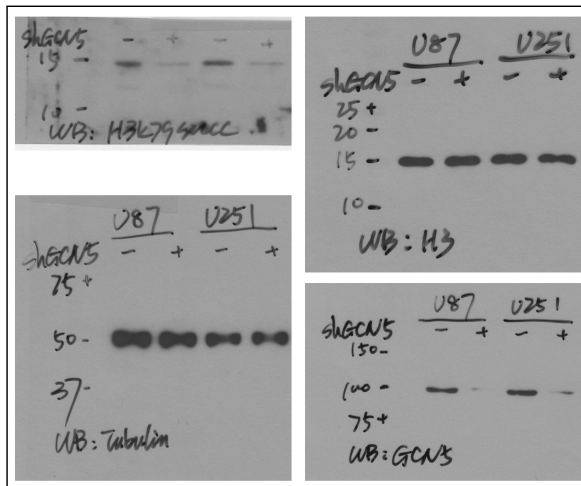

Fig. 3c

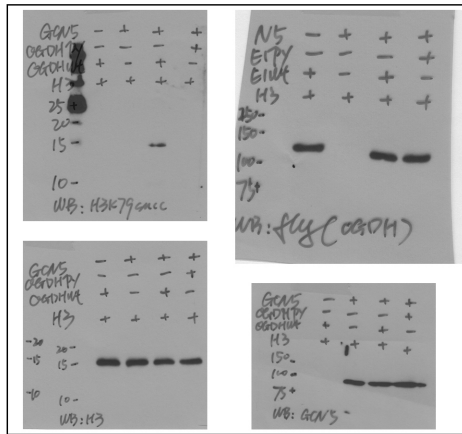

E1py, Flag-rOGDH mut  
E1wt, WT Flag-rOGDH  
OGDHpy, Flag-rOGDH mut  
OGDHwt, WT Flag-rOGDH

Fig. 3d

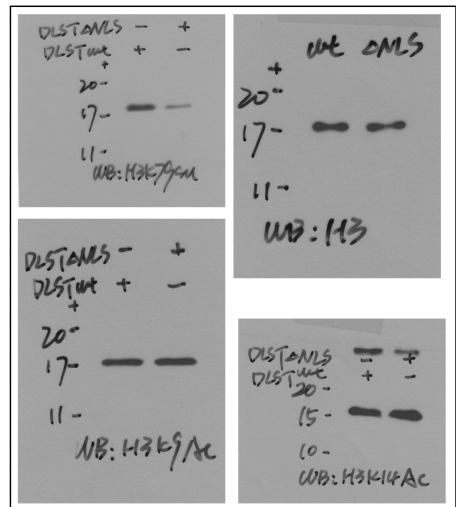

Fig. 3g

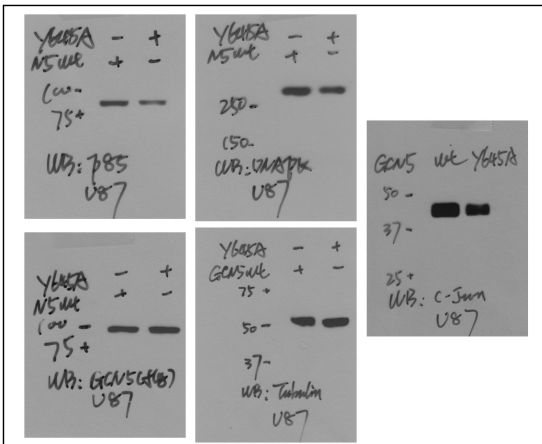

Fig. 3h

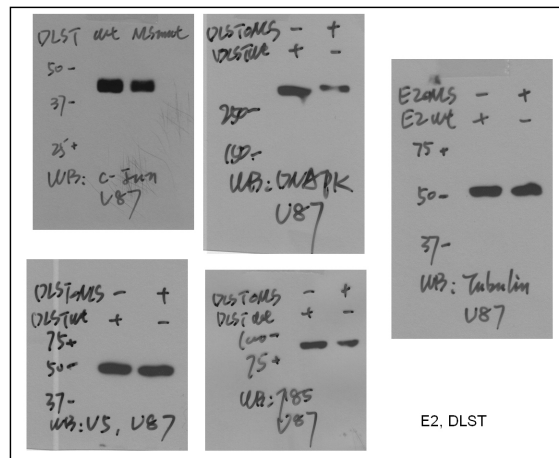

E2, DLST

# Figure 4

Fig. 4d

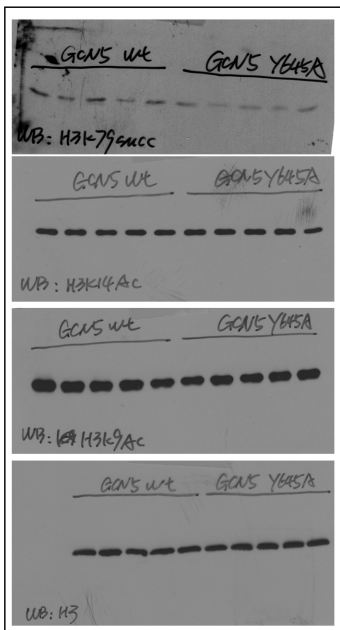

# Extended Data figure 1

Extended Data Fig. 1d

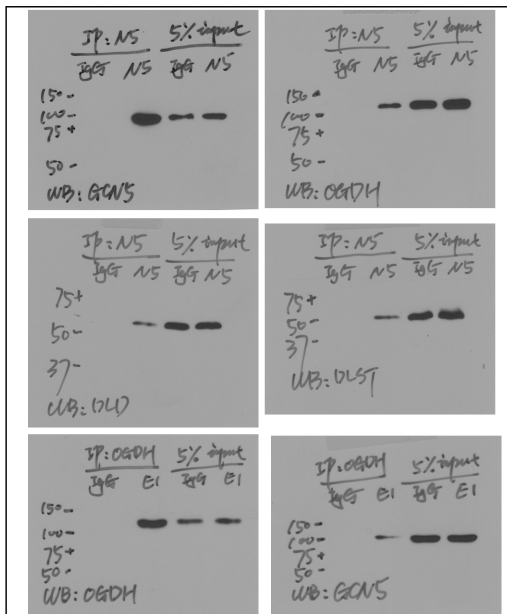

Extended Data Fig. 1e

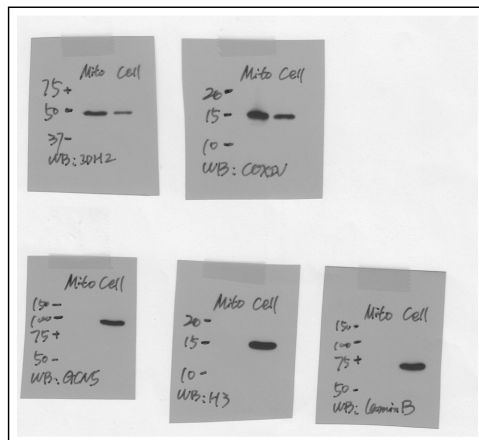

Extended Data Fig. 1g

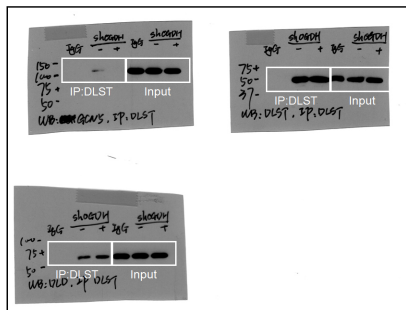

Extended Data Fig. 1i

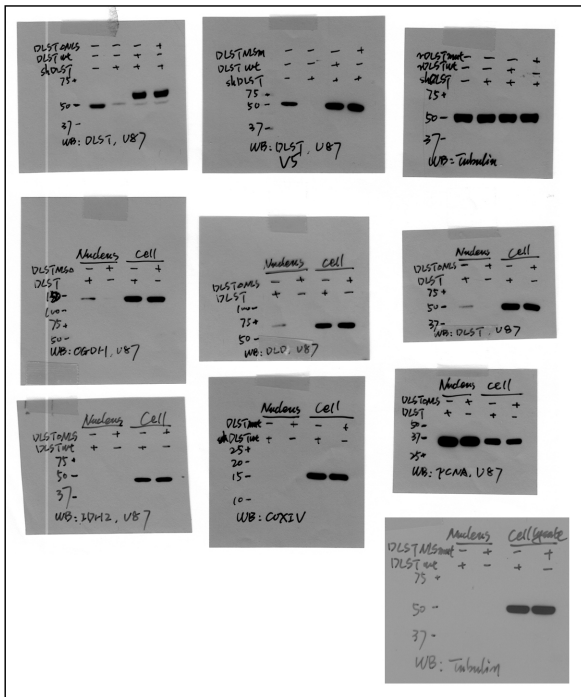

# Extended Data Figure 2

Extended Data Fig. 2a

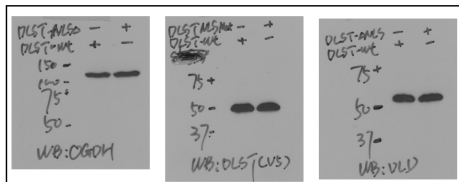

Extended Data Fig. 2c

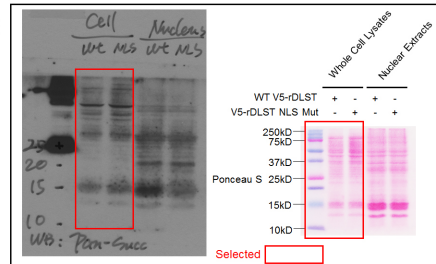

Extended Data Fig. 2e

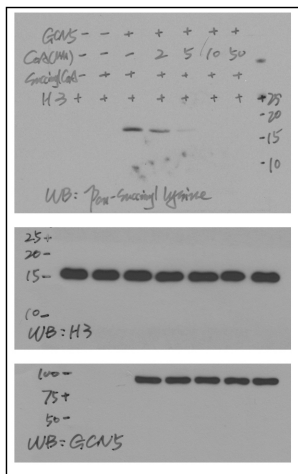

Extended Data Fig. 2h

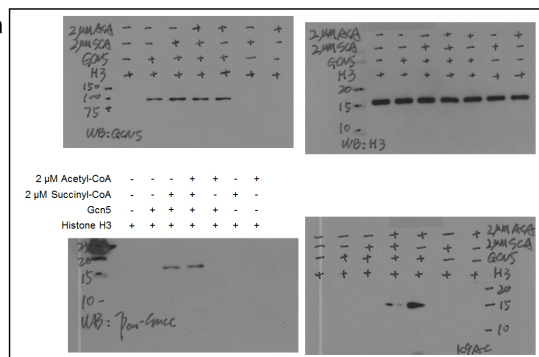

Extended Data Fig. 2i

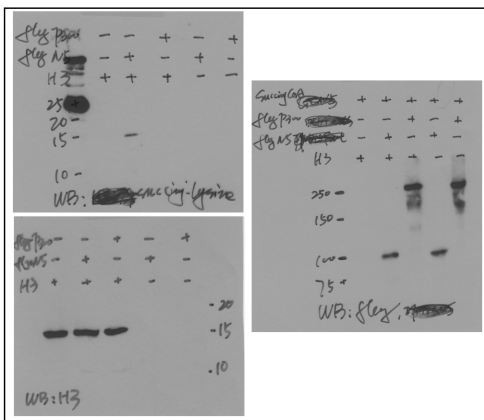

# Extended Data Figure 3

Extended Data Fig. 3b

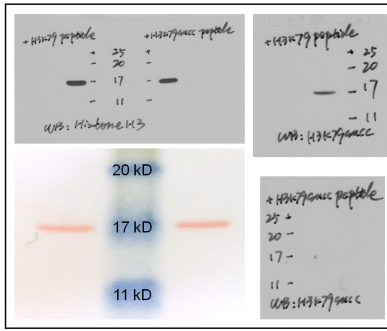

Extended Data Fig. 3g

PY: OGDH mutant

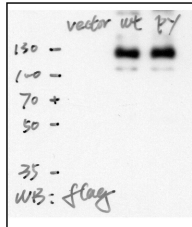

Extended Data Fig. 3e

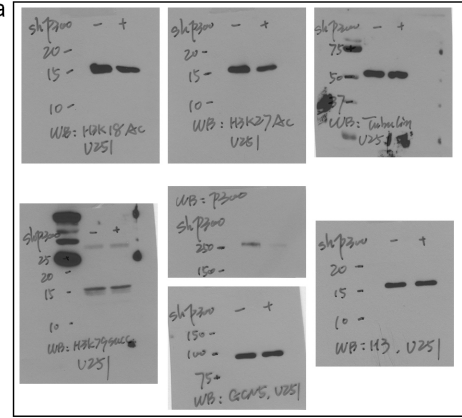

Extended Data Fig. 3h

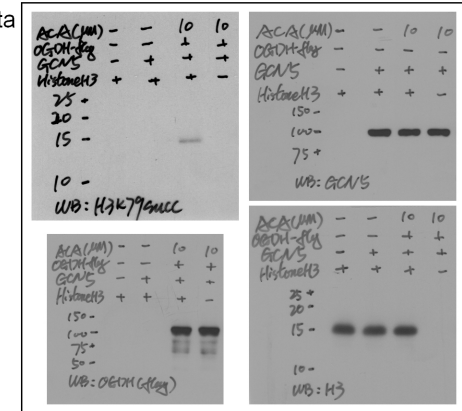

Extended Data Fig. 3i

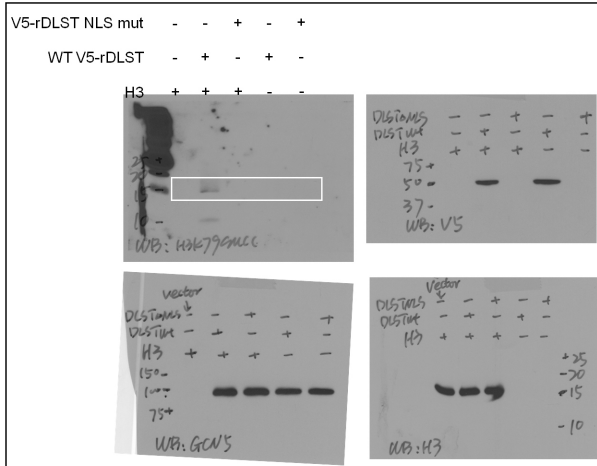

Extended Data Fig. 3j

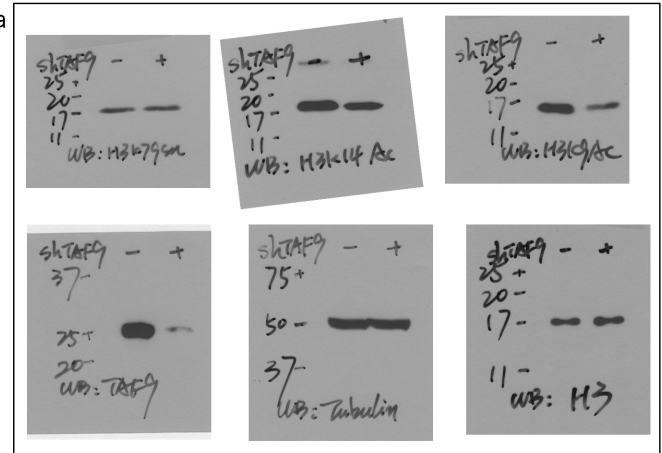

Extended Data Fig. 3m

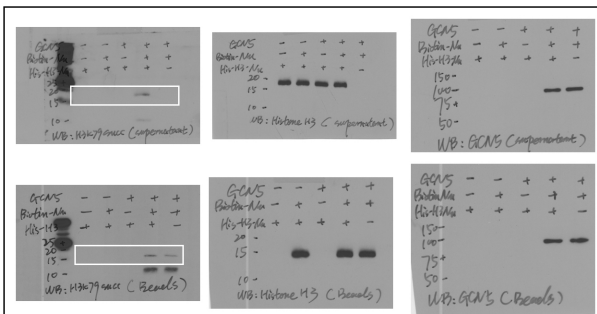

# Extended Data figure 5

Extended Data  
Fig. 5h

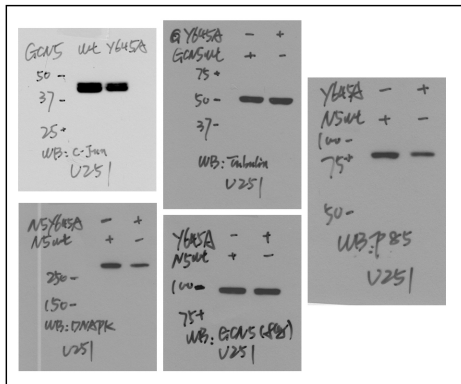

Extended Data  
Fig. 5i

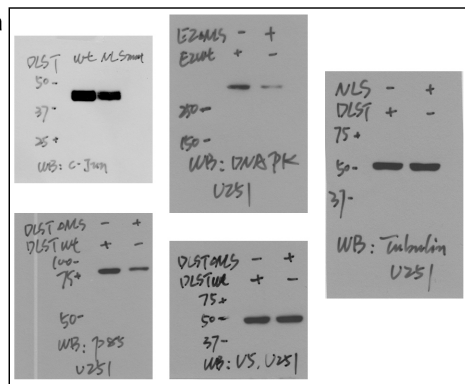



# Extended Data figure 6

Extended Data  
Fig. 6f

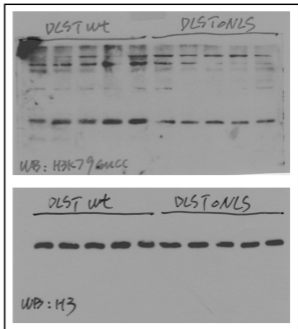

**U251 cells**

|       | WT V5-rDLST (X10,000) |      | average | SD        |          |
|-------|-----------------------|------|---------|-----------|----------|
| Day 0 | 5                     | 5    | 5       | 5         | 0        |
| Day 1 | 7.8                   | 7.92 | 7.7     | 7.806667  | 0.110151 |
| Day 2 | 15.6                  | 16.3 | 14.99   | 15.63     | 0.655515 |
| Day 3 | 32.1                  | 30.1 | 32.1    | 31.433333 | 1.154701 |
| Day 4 | 69.8                  | 73.2 | 71.5    | 71.5      | 1.7      |
| Day 5 | 121                   | 122  | 124     | 122.3333  | 1.527525 |
| Day 6 | 167                   | 169  | 172     | 169.3333  | 2.516611 |
| Day 7 | 216                   | 234  | 232     | 227.3333  | 9.865766 |
| Day 8 | 287.7                 | 315  | 299     | 300.5667  | 13.71726 |
| Day 9 | 306                   | 324  | 314     | 314.6667  | 9.0185   |

|       | V5-rDLST NLS Mut (X10,000) |      | average | SD       |          |
|-------|----------------------------|------|---------|----------|----------|
| Day 0 | 5                          | 5    | 5       | 5        | 0        |
| Day 1 | 7.52                       | 8.68 | 8.05    | 8.083333 | 0.580718 |
| Day 2 | 12                         | 14.7 | 13.33   | 13.34333 | 1.350049 |
| Day 3 | 30                         | 31.9 | 32.1    | 31.33333 | 1.159023 |
| Day 4 | 59.2                       | 65.6 | 61.1    | 61.96667 | 3.286842 |
| Day 5 | 101                        | 105  | 100     | 102      | 2.645751 |
| Day 6 | 110                        | 152  | 133     | 131.6667 | 21.03172 |
| Day 7 | 166                        | 147  | 151     | 154.6667 | 10.01665 |
| Day 8 | 181                        | 180  | 189     | 183.3333 | 4.932883 |
| Day 9 | 181                        | 199  | 192     | 190.6667 | 9.073772 |

|       | WT Flag-rGcn5 (X10,000) |      | Average | SD       |          |
|-------|-------------------------|------|---------|----------|----------|
| Day 0 | 5                       | 5    | 5       | 5        | 0        |
| Day 1 | 6.8                     | 7.2  | 7.7     | 7.233333 | 0.450925 |
| Day 2 | 13.4                    | 15.5 | 16.8    | 15.23333 | 1.715615 |
| Day 3 | 33                      | 34.5 | 33.6    | 33.7     | 0.754983 |
| Day 4 | 75.1                    | 77.9 | 80.1    | 77.7     | 2.505993 |
| Day 5 | 133                     | 146  | 152     | 143.6667 | 9.712535 |
| Day 6 | 212                     | 192  | 222     | 208.6667 | 15.27525 |
| Day 7 | 277                     | 268  | 288     | 277.6667 | 10.01665 |
| Day 8 | 320                     | 333  | 342     | 331.6667 | 11.06044 |
| Day 9 | 333                     | 353  | 335     | 340.3333 | 11.01514 |

|       | Flag-rGcn5 Y645 (X10,000) |      | Average | SD       |          |
|-------|---------------------------|------|---------|----------|----------|
| Day 0 | 5                         | 5    | 5       | 5        | 0        |
| Day 1 | 6.6                       | 6.9  | 5.8     | 6.433333 | 0.568624 |
| Day 2 | 13.6                      | 14.2 | 11.1    | 12.96667 | 1.644182 |
| Day 3 | 29.2                      | 33.5 | 28.5    | 30.4     | 2.707397 |
| Day 4 | 68.3                      | 58   | 62.5    | 62.93333 | 5.163655 |
| Day 5 | 95                        | 109  | 100     | 101.3333 | 7.094599 |
| Day 6 | 152                       | 123  | 132     | 135.6667 | 14.84363 |
| Day 7 | 172                       | 146  | 166     | 161.3333 | 13.61372 |
| Day 8 | 196                       | 211  | 168     | 191.6667 | 21.82506 |

|       |     |     |     |          |          |
|-------|-----|-----|-----|----------|----------|
| Day 9 | 229 | 234 | 201 | 221.3333 | 17.78576 |
|-------|-----|-----|-----|----------|----------|

**U87 cells**

|       | WT V5-rDLST (X10,000) |      | average SD |          |          |
|-------|-----------------------|------|------------|----------|----------|
| Day 0 | 5                     | 5    | 5          | 5        | 0        |
| Day 1 | 4.55                  | 5.71 | 5.22       | 5.16     | 0.582323 |
| Day 2 | 8.68                  | 7.74 | 8.21       | 8.21     | 0.47     |
| Day 3 | 20.1                  | 21   | 21         | 20.7     | 0.519615 |
| Day 4 | 51.1                  | 48.6 | 50.2       | 49.96667 | 1.266228 |
| Day 5 | 77.3                  | 81.4 | 77.9       | 78.86667 | 2.214347 |
| Day 6 | 104                   | 111  | 108        | 107.6667 | 3.511885 |
| Day 7 | 123                   | 135  | 132        | 130      | 6.244998 |
| Day 8 | 135                   | 142  | 139        | 138.6667 | 3.511885 |
| Day 9 | 139                   | 149  | 145        | 144.3333 | 5.033223 |

|       | V5-rDLST NLS Mut (X10,000) |      | average SD |          |          |
|-------|----------------------------|------|------------|----------|----------|
| Day 0 | 5                          | 5    | 5          | 5        | 0        |
| Day 1 | 4.98                       | 5.01 | 5.11       | 5.033333 | 0.068069 |
| Day 2 | 7.78                       | 6.36 | 7.21       | 7.116667 | 0.714586 |
| Day 3 | 17.3                       | 16   | 16.8       | 16.7     | 0.655744 |
| Day 4 | 35.1                       | 39.2 | 37.2       | 37.16667 | 2.050203 |
| Day 5 | 55.5                       | 51   | 54         | 53.5     | 2.291288 |
| Day 6 | 70.3                       | 77.7 | 74         | 74       | 3.7      |
| Day 7 | 88                         | 81.7 | 86.1       | 85.26667 | 3.231615 |
| Day 8 | 85.3                       | 91.1 | 89         | 88.46667 | 2.936551 |
| Day 9 | 93.6                       | 90   | 92.2       | 91.93333 | 1.814754 |

|       | WT Flag-rGcn5 (X10,000) |     | Average SD |          |          |
|-------|-------------------------|-----|------------|----------|----------|
| Day 0 | 5                       | 5   | 5          | 5        | 0        |
| Day 1 | 6.6                     | 6.1 | 6.2        | 6.3      | 0.264575 |
| Day 2 | 8.5                     | 9.1 | 10         | 9.2      | 0.754983 |
| Day 3 | 19.8                    | 20  | 23         | 20.93333 | 1.792577 |
| Day 4 | 46                      | 52  | 51         | 49.66667 | 3.21455  |
| Day 5 | 88                      | 82  | 83         | 84.33333 | 3.21455  |
| Day 6 | 111                     | 120 | 135        | 122      | 12.12436 |
| Day 7 | 144                     | 144 | 152        | 146.6667 | 4.618802 |
| Day 8 | 177                     | 177 | 152        | 168.6667 | 14.43376 |
| Day 9 | 200                     | 165 | 172        | 179      | 18.52026 |

|       | Flag-rGcn5 Y645 (X10,000) |      | Average SD |          |          |
|-------|---------------------------|------|------------|----------|----------|
| Day 0 | 5                         | 5    | 5          | 5        | 0        |
| Day 1 | 5.8                       | 6.6  | 6.1        | 6.166667 | 0.404145 |
| Day 2 | 8.4                       | 7.8  | 7.5        | 7.9      | 0.458258 |
| Day 3 | 16.5                      | 17.8 | 16.9       | 17.06667 | 0.665833 |
| Day 4 | 41.5                      | 39.2 | 33         | 37.9     | 4.39659  |
| Day 5 | 69                        | 58   | 62         | 63       | 5.567764 |
| Day 6 | 73                        | 76   | 86         | 78.33333 | 6.806859 |

|       |     |     |     |          |          |
|-------|-----|-----|-----|----------|----------|
| Day 7 | 101 | 98  | 88  | 95.66667 | 6.806859 |
| Day 8 | 110 | 109 | 89  | 102.6667 | 11.84624 |
| Day 9 | 126 | 120 | 101 | 115.6667 | 13.05118 |
